# Supplementary material
Source: PubMed Central journal article supplement (PMC7648610)
Supplement: joces-133-254094-s1.pdf [file joces-133-254094-s1.pdf]

Jacob et al. Figure S1

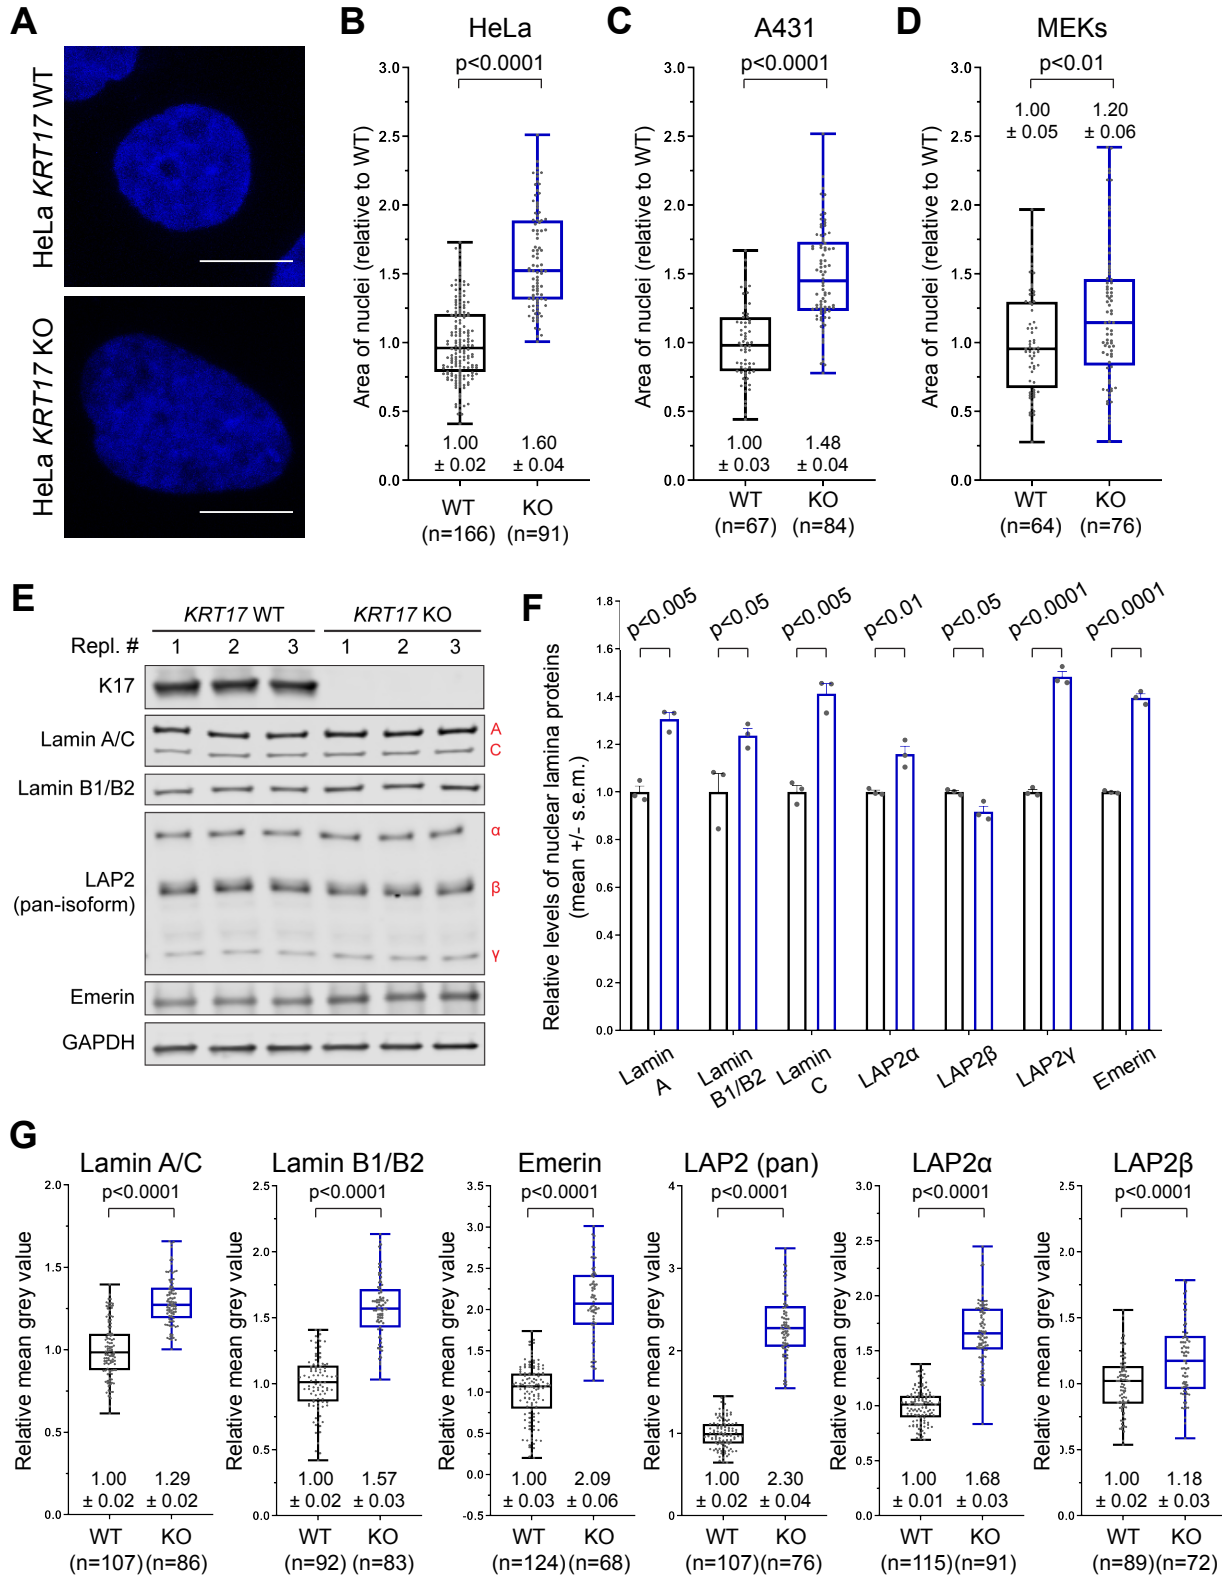

## **Figure S1**

### **Loss of K17 alters nuclear morphology and nuclear lamina-associated proteins.**

**(A)** Confocal micrograph maximum intensity projections (MIPs) of individual nuclei from *KRT17* WT vs. *KRT17* KO HeLa cells. Nuclei are stained with DAPI (blue). Scale bars, 10  $\mu\text{m}$ . **(B, C, and D)** Quantified area measurements of nuclei from cultured *KRT17* WT vs. KO *KRT17* (B) HeLa and (C) A431 human epithelial tumor cells, and (D) primary mouse epidermal keratinocytes (MEKs). Numeric values above or below each box-and-whisker plot designate the mean  $\pm$  standard error of the mean (s.e.m.). **(E)** Western blots of nuclear lamina-associated proteins from whole-cell lysates of *KRT17* WT and *KRT17* KO HeLa cells (n=3 biological replicates per genotype). **(F)** Quantitation of Western blot band intensities in (E), each normalized to GAPDH loading control. **(G)** Quantitation of mean immunofluorescence signal intensity of confocal micrograph MIPs of nuclei immunostained with antibodies recognizing several nuclear lamina-associated proteins (refer to **Fig. 1E**).

Jacob et al., Figure S2

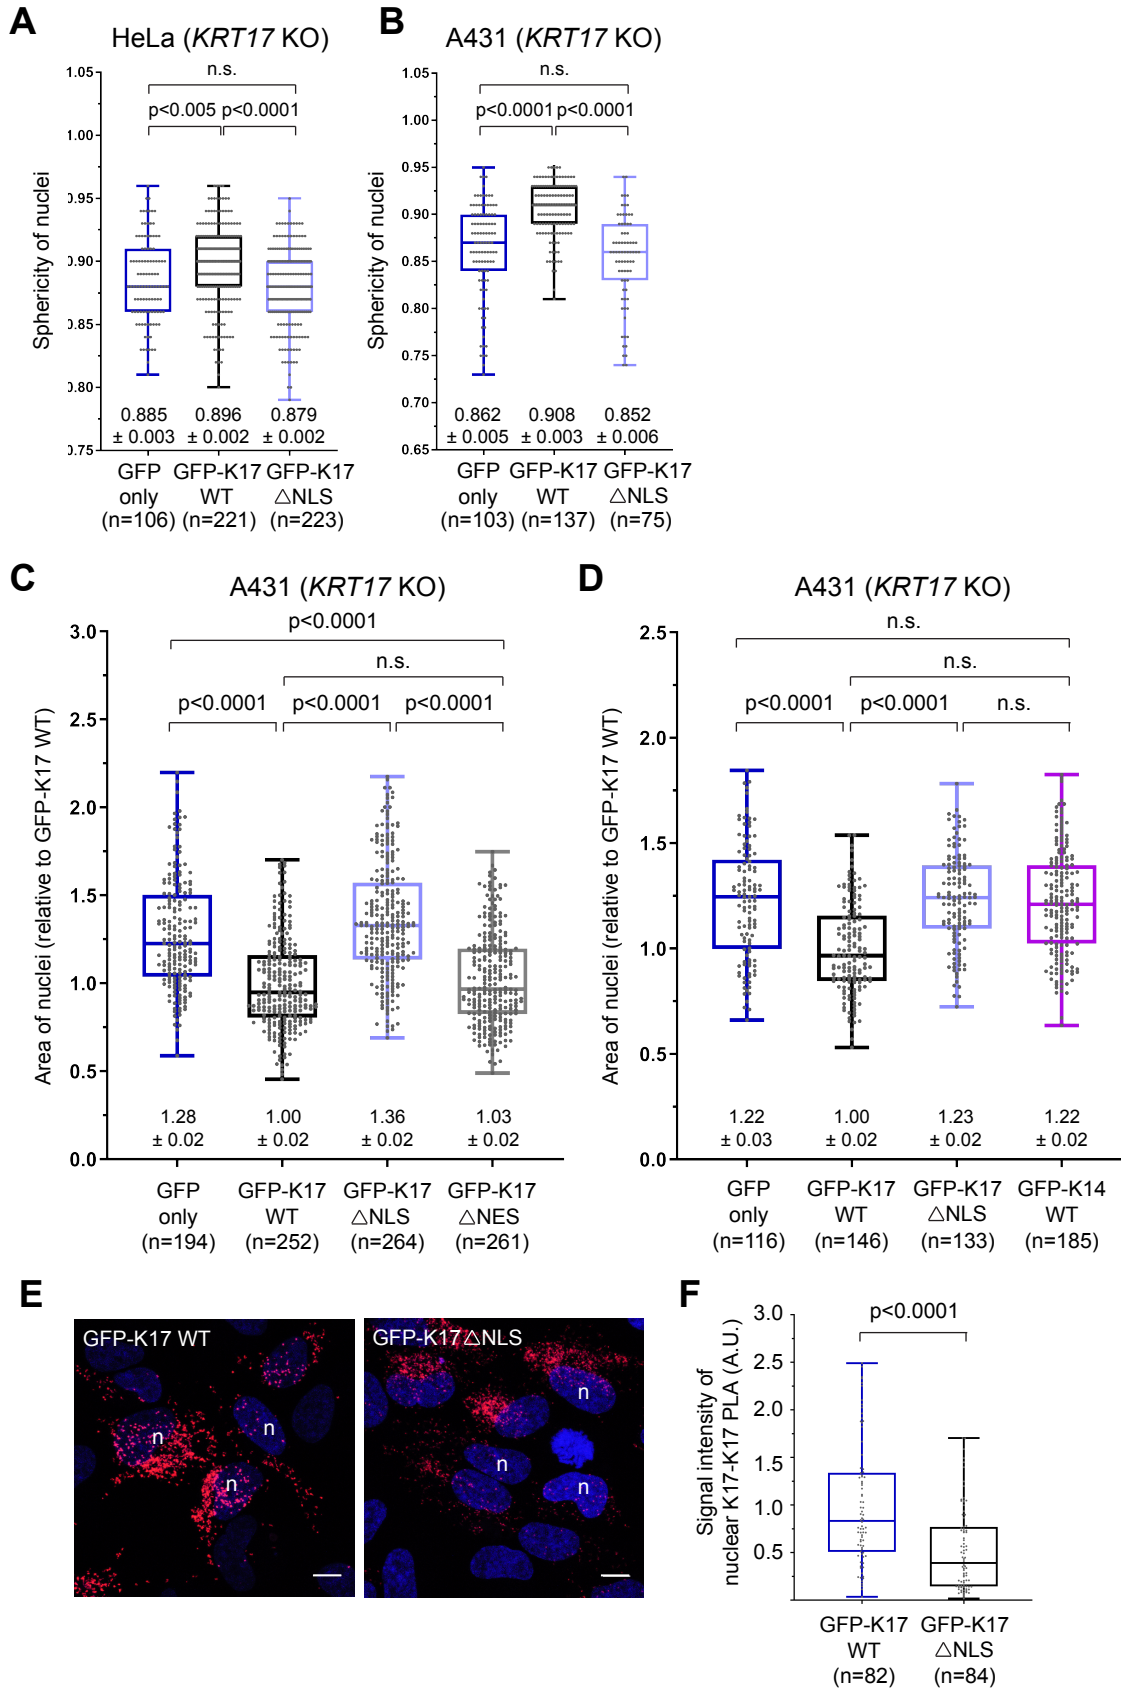

## **Figure S2**

### **Nuclear-localized K17 rescues nuclear morphology.**

**(A and B)** Quantified sphericity measurements of nuclei from (A) HeLa *KRT17* KO and (B) A431 *KRT17* KO cells transiently transfected (48-hour transfection) with GFP (only), GFP-K17 WT, or GFP-K17 $\Delta$ NLS plasmid constructs. Numeric values below each box-and-whisker plot designate the mean  $\pm$  s.e.m. **(C and D)** Quantified area measurements of nuclei from A431 *KRT17* KO cells transiently transfected (48-hour transfection) with GFP (only), GFP-K17 WT, GFP-K17 $\Delta$ NLS, and (C) GFP-K17 $\Delta$ NES or (D) GFP-K14 WT plasmid constructs. Numeric values below each box-and-whisker plot designate the mean  $\pm$  s.e.m. **(E)** Confocal micrograph MIPs of proximity ligation assays (PLAs) of HeLa *KRT17* KO cells transfected (48-hour transfection) with GFP-K17 WT or GFP-K17 $\Delta$ NLS. PLAs relied on the use of two different host-species antibodies recognizing K17. Scale bars, 10  $\mu$ m. **(F)** Quantitation of nuclear PLA signal intensities in (E). A.U., arbitrary units.



Jacob et al., Figure S3

**A**

***Krt17* WT sequence**

5'-gatgccacctgactcagtac **aagcca** **aaaga**acctgtgaccacccgccaggtgcgacc-3'  
 aa392 D A H L T Q Y **K P K** E P V T T R Q V R T aa411  
 3'-ctacgggtggactgagtcagtcggtcggtttcttggaactggtggcggtccacgcgtgg-5'  
 aa 399 aa 401

***Krt17*  $\Delta$ NLS sequence**

5'-gatgccacctgacacagtac **gcgcca** **gca**aacctgtgaccacccgccaggtgcgacc-3'  
 aa392 D A H L T Q Y **A P A** E P V T T R Q V R T aa411  
 5'-ctacgggtggactggtcatgcgcggtcgtcttggaactggtggcggtccacgcgtgg-3'  
**BstUI Cleavage Site**

**B**

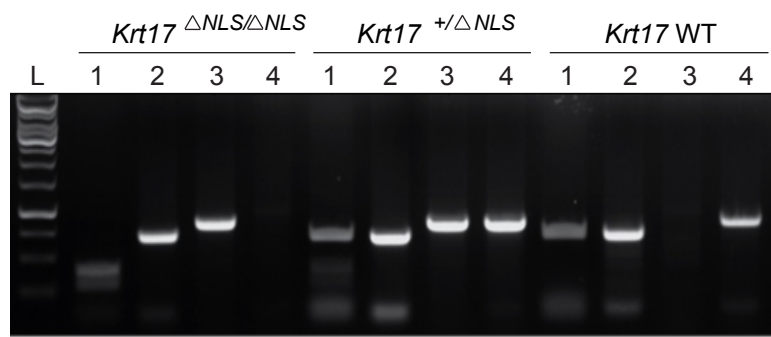

**C**

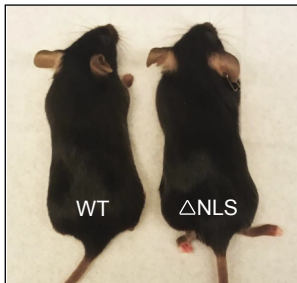

**D**

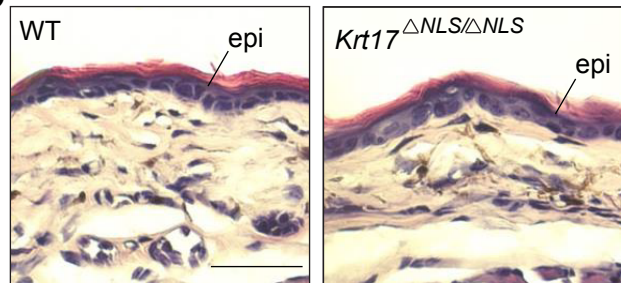

**E**

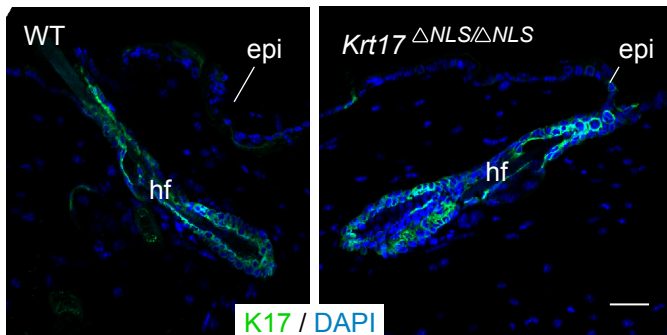

### **Figure S3**

#### **Genesis of a *Krt17*<sup>ΔNLS/ΔNLS</sup> mouse strain.**

**(A)** DNA and protein sequences for the *Krt17* WT and *Krt17*<sup>ΔNLS</sup> alleles. Lysine-399 (K399) and Lysine-401 (K401) are both mutated to Alanine residues (K399A and K401A) in the *Krt17*<sup>ΔNLS</sup> mutant allele. The *Krt17*<sup>ΔNLS</sup> mutant allele contains a new BstUI restriction enzyme cleavage site (purple text and line). **(B)** RT-PCR genotyping results for *Krt17*<sup>ΔNLS/ΔNLS</sup>, *Krt17*<sup>+/ΔNLS</sup>, and *Krt17* WT mice. (lane 1) BstUI digest of the NLS flanking region; (lane 2) undigested control of the product digested in lane 1; (lane 3) PCR amplification using the *Krt17*<sup>ΔNLS</sup> mutant-specific primer; and (lane 4) PCR amplification using the *Krt17* WT-specific primer. **(C)** Age-matched *Krt17* WT and *Krt17*<sup>ΔNLS/ΔNLS</sup> mutant (“ΔNLS”) mice demonstrating a comparable phenotype at baseline. **(D)** Hematoxylin and eosin staining of (P60) ear tissue sections from *Krt17* WT and *Krt17*<sup>ΔNLS/ΔNLS</sup> mutant mice. Scale bars, 50 μm. **(E)** Confocal micrographs of hair follicles from *Krt17* WT and *Krt17*<sup>ΔNLS/ΔNLS</sup> mice, immunostained for K17 (green). DAPI, blue. Scale bars, 50 μm.

Jacob et al., Figure S4

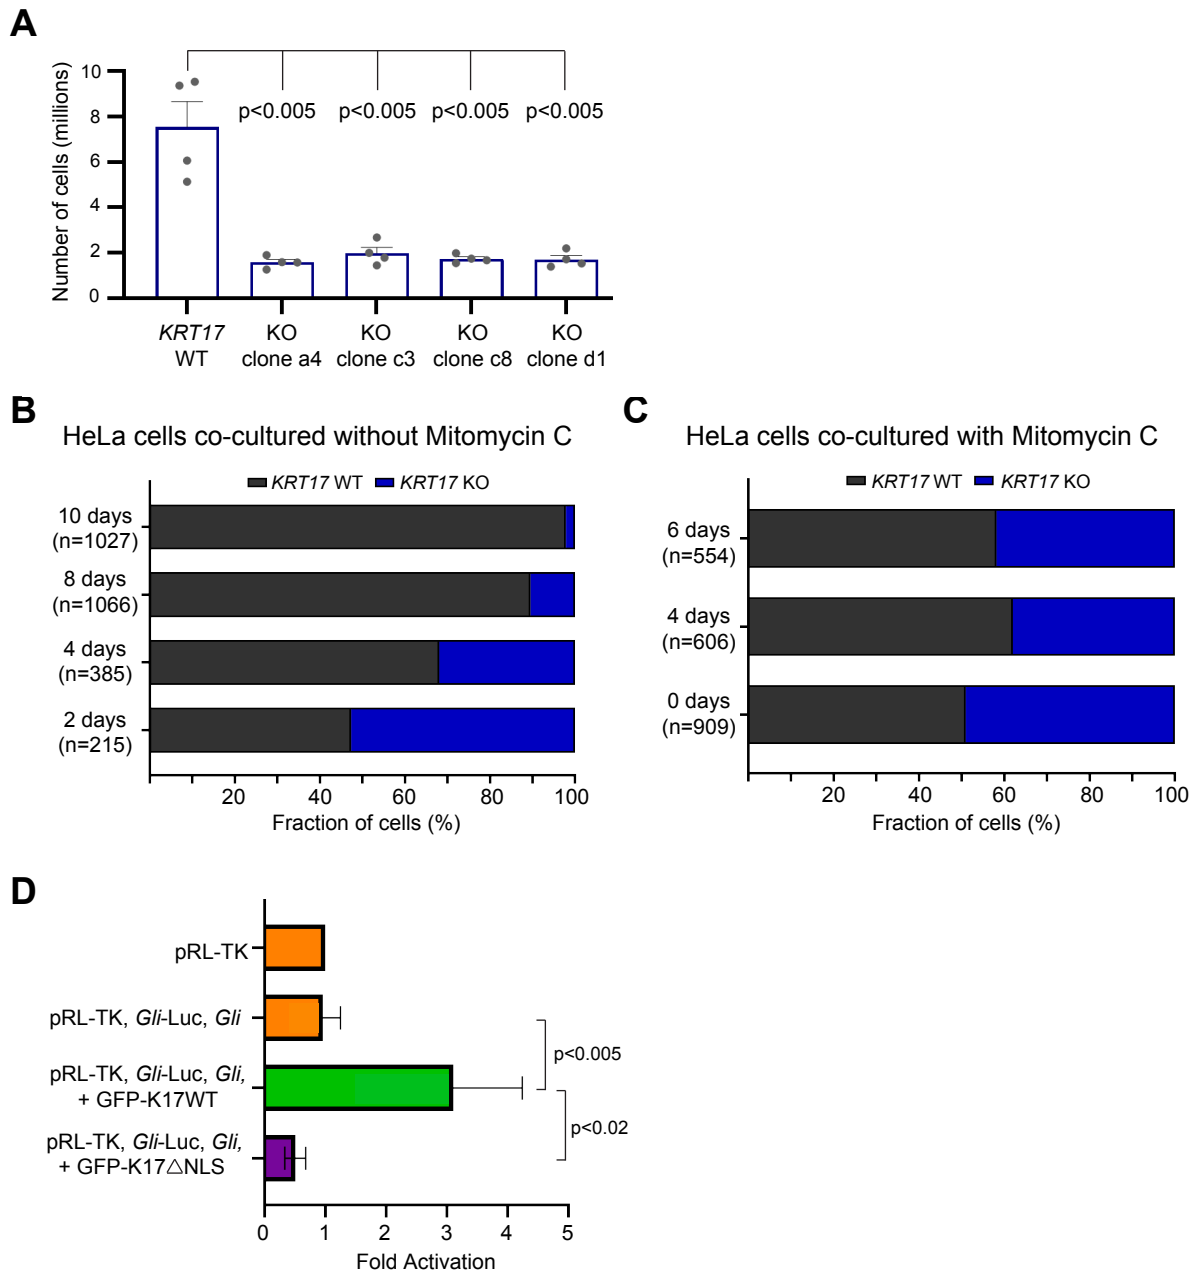

## **Figure S4**

### **Impact of K17 loss on cell proliferation and GLI1 function.**

**(A)** Cell counting assay using a hemocytometer to count the number of cells after seeding 500,000 cells per genotype (e.g. HeLa *KRT17* WT cells and four different HeLa *KRT17* KO clones) and culturing at 37°C and 5% CO<sub>2</sub> for three days. **(B)** Quantitation of the percent of HeLa *KRT17* WT and *KRT17* KO cells after mixing and plating 1:1 and then culturing in normal growth media for different lengths of time. **(C)** Quantitation of the percent of HeLa *KRT17* WT and *KRT17* KO cells after mixing and plating 1:1 and then culturing in normal growth media (supplemented with Mitomycin C) for different lengths of time. **(D)** Luciferase assays in HeLa KO cells transfected with a *Gli1*-Luciferase reporter construct (see Methods). Data were normalized with regard to transfection efficiency and signal obtained with pRL-TK vector control. Data represent mean ± s.e.m. from 5 biological replicates each consisting of 6 technical replicates. Mann-Whitney tests were performed to compare each parameter using GraphPad Prism 8.

**Table S1**

**Top entries from proteomics screen for K17-interacting proteins in nuclear extracts from A431 keratinocytes.**  
Data filtering (e.g., 127N/130N ratio >1.2; 127N/130N count >4; cf. Methods) yielded 77 proteins enriched by K17 IP in *KRT17* WT cells over *KRT17* KO cells.

**TABLE S1 Source data file - Jacob et al. - Unbiased Proteomics Screen - K17 interacting proteins listed according to 127N / 130N count (>4)**

| Accession | Gene              | Coverage | # Unique Peptides | # Peptides | PSMs | 127N / 130N ratio | 127N / 130N Count | MW [kDa] | calc. pl |
|-----------|-------------------|----------|-------------------|------------|------|-------------------|-------------------|----------|----------|
| 4504309   | <i>HIST4H4</i>    | 64.08%   | 13                | 14         | 648  | 1.472             | 216               | 11.4     | 11.4     |
| 530384720 | <i>HNRNPA2B1</i>  | 71.67%   | 20                | 26         | 774  | 1.264             | 186               | 37.4     | 8.95     |
| 4885381   | <i>HIST1H1B</i>   | 55.75%   | 17                | 27         | 644  | 1.361             | 143               | 22.6     | 10.9     |
| 5902076   | <i>SRSF1</i>      | 42.34%   | 11                | 13         | 197  | 1.209             | 55                | 27.7     | 10.4     |
| 55956921  | <i>HNRNPAB</i>    | 57.54%   | 12                | 18         | 169  | 1.292             | 54                | 30.6     | 7.91     |
| 40254924  | <i>LRRC59</i>     | 41.04%   | 12                | 15         | 179  | 1.362             | 50                | 34.9     | 9.57     |
| 167234419 | <i>THRAP3</i>     | 27.64%   | 18                | 28         | 170  | 1.273             | 47                | 108.6    | 10.2     |
| 4506901   | <i>SRSF3</i>      | 38.41%   | 7                 | 8          | 343  | 1.266             | 46                | 19.3     | 11.7     |
| 4885377   | <i>HIST1H1D</i>   | 59.73%   | 7                 | 26         | 739  | 1.25              | 44                | 22.3     | 11       |
| 238776833 | <i>ALYRF</i>      | 46.21%   | 12                | 12         | 180  | 1.351             | 43                | 27.5     | 11.1     |
| 4506695   | <i>RPS19</i>      | 59.31%   | 11                | 13         | 133  | 1.217             | 43                | 16.1     | 10.3     |
| 4885379   | <i>HIST1H1E</i>   | 63.93%   | 7                 | 27         | 793  | 1.347             | 41                | 21.9     | 11       |
| 7705373   | <i>LIMA1</i>      | 37.42%   | 20                | 28         | 137  | 1.225             | 36                | 85.2     | 6.84     |
| 5031749   | <i>HMG2</i>       | 65.56%   | 3                 | 10         | 224  | 1.895             | 33                | 9.4      | 9.99     |
| 4885375   | <i>HIST1H1C</i>   | 61.50%   | 6                 | 26         | 745  | 1.268             | 32                | 21.4     | 10.9     |
| 4557701   | <i>KRT17</i>      | 52.31%   | 12                | 28         | 279  | 2.514             | 30                | 48.1     | 5.02     |
| 42734430  | <i>PTRF</i>       | 32.82%   | 9                 | 12         | 100  | 1.204             | 25                | 43.4     | 5.6      |
| 4506903   | <i>SRSF9</i>      | 46.15%   | 9                 | 11         | 95   | 1.251             | 24                | 25.5     | 8.65     |
| 106775678 | <i>HIST2H2AA3</i> | 68.46%   | 4                 | 11         | 565  | 1.69              | 23                | 14.1     | 10.9     |
| 332801090 | <i>HNRNPDL</i>    | 25.62%   | 8                 | 10         | 80   | 1.289             | 19                | 40       | 9.96     |
| 578831350 | <i>UBTF</i>       | 22.64%   | 10                | 18         | 71   | 1.227             | 19                | 89.4     | 5.81     |
| 4504253   | <i>H2AX</i>       | 65.03%   | 4                 | 11         | 409  | 1.638             | 18                | 15.1     | 10.7     |
| 530384472 | <i>CBX3</i>       | 33.33%   | 5                 | 7          | 82   | 1.32              | 17                | 20.8     | 5.33     |
| 321267473 | <i>SAFB</i>       | 20.64%   | 6                 | 17         | 97   | 1.454             | 16                | 95.1     | 6.46     |
| 190885499 | <i>COX5A</i>      | 21.33%   | 4                 | 4          | 47   | 1.304             | 15                | 16.8     | 6.79     |
| 4506715   | <i>RPS28</i>      | 46.38%   | 3                 | 3          | 41   | 1.203             | 15                | 7.8      | 10.7     |
| 4504297   | <i>HIST1H3A</i>   | 51.47%   | 2                 | 11         | 323  | 1.263             | 14                | 15.4     | 11.1     |
| 359279859 | <i>DPYSL5</i>     | 1.24%    | 1                 | 1          | 37   | 1.226             | 13                | 61.4     | 7.2      |
| 4506773   | <i>S100A9</i>     | 51.75%   | 6                 | 6          | 38   | 1.505             | 12                | 13.2     | 6.13     |
| 4504255   | <i>H2AFZ</i>      | 53.91%   | 3                 | 5          | 237  | 1.329             | 12                | 13.5     | 10.6     |
| 48255933  | <i>HMG1</i>       | 52.00%   | 6                 | 7          | 37   | 1.375             | 11                | 10.7     | 9.6      |
| 4758302   | <i>ERH</i>        | 28.85%   | 3                 | 5          | 43   | 1.303             | 11                | 12.3     | 5.92     |
| 327478416 | <i>OCLN</i>       | 35.06%   | 7                 | 8          | 37   | 1.301             | 11                | 31.6     | 5.68     |
| 6912292   | <i>CBX5</i>       | 31.94%   | 5                 | 7          | 39   | 1.268             | 11                | 22.2     | 5.86     |
| 19557702  | <i>SURF6</i>      | 20.50%   | 7                 | 9          | 38   | 1.202             | 11                | 41.4     | 10.6     |
| 530364188 | <i>S100A16</i>    | 39.81%   | 3                 | 3          | 30   | 1.518             | 10                | 11.8     | 6.79     |
| 166795236 | <i>TACSTD2</i>    | 23.53%   | 4                 | 7          | 37   | 1.276             | 10                | 35.7     | 8.87     |
| 4502491   | <i>C1QBP</i>      | 16.67%   | 2                 | 4          | 40   | 1.251             | 10                | 31.3     | 4.84     |
| 6912676   | <i>SNW1</i>       | 21.08%   | 7                 | 8          | 32   | 1.206             | 10                | 61.5     | 9.52     |

| Accession | Gene             | Coverage | # Unique Peptides | # Peptides | PSMs | 127N / 130N ratio | 127N / 130N Count | MW [kDa] | calc. pl |
|-----------|------------------|----------|-------------------|------------|------|-------------------|-------------------|----------|----------|
| 54633315  | <i>DNTTIP2</i>   | 12.04%   | 5                 | 9          | 39   | 1.455             | 9                 | 84.4     | 6.16     |
| 5454152   | <i>UQCRB</i>     | 47.75%   | 4                 | 6          | 38   | 1.235             | 9                 | 13.5     | 8.78     |
| 255652953 | <i>ZC3H18</i>    | 9.44%    | 6                 | 9          | 30   | 1.228             | 9                 | 106.3    | 8.32     |
| 386781463 | <i>LSR</i>       | 17.01%   | 6                 | 7          | 30   | 1.222             | 9                 | 59.7     | 9.41     |
| 9624998   | <i>HNRNP2</i>    | 25.17%   | 2                 | 8          | 129  | 2.092             | 8                 | 49.2     | 6.3      |
| 21614544  | <i>S100A8</i>    | 16.13%   | 2                 | 2          | 13   | 1.59              | 8                 | 10.8     | 7.03     |
| 5803137   | <i>RBM3</i>      | 17.20%   | 2                 | 3          | 24   | 1.347             | 8                 | 17.2     | 8.91     |
| 20149675  | <i>EFHD2</i>     | 25.83%   | 4                 | 7          | 30   | 1.32              | 8                 | 26.7     | 5.2      |
| 767948000 | <i>SRRT</i>      | 8.78%    | 5                 | 7          | 28   | 1.292             | 8                 | 90.3     | 5.62     |
| 7661742   | <i>C19orf53</i>  | 42.42%   | 4                 | 6          | 28   | 1.264             | 8                 | 10.6     | 11.6     |
| 767909532 | <i>PIGR</i>      | 9.82%    | 5                 | 6          | 24   | 2                 | 7                 | 83.2     | 5.74     |
| 27735127  | <i>SLC35F3</i>   | 3.27%    | 1                 | 2          | 9    | 1.255             | 7                 | 54.7     | 9.51     |
| 768012048 | <i>TIMM50</i>    | 15.25%   | 4                 | 4          | 21   | 1.228             | 7                 | 38.3     | 6.55     |
| 4506699   | <i>RPS21</i>     | 20.48%   | 2                 | 2          | 26   | 1.227             | 7                 | 9.1      | 8.5      |
| 28195394  | <i>HIST2H2AB</i> | 70.00%   | 2                 | 8          | 274  | 1.831             | 6                 | 14       | 10.9     |
| 148664186 | <i>PKP2</i>      | 7.77%    | 5                 | 5          | 21   | 1.231             | 6                 | 92.7     | 9.29     |
| 20270186  | <i>HMG3</i>      | 31.31%   | 3                 | 5          | 45   | 1.421             | 5                 | 10.7     | 9.66     |
| 14043026  | <i>VAMP8</i>     | 27.00%   | 3                 | 3          | 18   | 1.308             | 5                 | 11.4     | 7.34     |
| 289577114 | <i>EIF4G2</i>    | 5.64%    | 4                 | 4          | 14   | 1.299             | 5                 | 98.1     | 6.99     |
| 21361376  | <i>SF3A2</i>     | 7.11%    | 2                 | 3          | 21   | 1.267             | 5                 | 49.2     | 9.64     |
| 61097912  | <i>NOM1</i>      | 8.14%    | 5                 | 6          | 16   | 1.238             | 5                 | 96.2     | 8.1      |
| 7706326   | <i>SF3B6</i>     | 34.40%   | 4                 | 5          | 15   | 1.222             | 5                 | 14.6     | 9.38     |
| 4885373   | <i>HIST1H1A</i>  | 38.14%   | 4                 | 13         | 363  | 1.211             | 5                 | 21.8     | 11       |
| 530427503 | <i>HNRNPM</i>    | 60.96%   | 1                 | 44         | 715  | 1.203             | 5                 | 75.6     | 8.57     |
| 767984396 | <i>CTDSP2</i>    | 18.28%   | 4                 | 7          | 19   | 1.544             | 4                 | 52.8     | 6.58     |
| 7705626   | <i>MRPS16</i>    | 20.44%   | 3                 | 3          | 15   | 1.506             | 4                 | 15.3     | 9.5      |
| 187960037 | <i>CBX1</i>      | 14.59%   | 1                 | 2          | 39   | 1.483             | 4                 | 21.4     | 4.93     |
| 260656008 | <i>SPINT2</i>    | 13.33%   | 2                 | 2          | 11   | 1.37              | 4                 | 21.8     | 8.38     |
| 171543879 | <i>CD99</i>      | 14.20%   | 2                 | 2          | 11   | 1.358             | 4                 | 17.1     | 4.56     |
| 47271443  | <i>SRSF2</i>     | 13.57%   | 3                 | 4          | 10   | 1.338             | 4                 | 25.5     | 11.9     |
| 18765731  | <i>SNAP23</i>    | 14.56%   | 2                 | 2          | 12   | 1.282             | 4                 | 17.8     | 4.69     |
| 10835240  | <i>HMG4</i>      | 25.56%   | 2                 | 4          | 17   | 1.259             | 4                 | 9.5      | 10.5     |
| 4506761   | <i>S100A10</i>   | 17.53%   | 3                 | 3          | 20   | 1.259             | 4                 | 11.2     | 7.37     |
| 22208975  | <i>HMG1</i>      | 37.50%   | 1                 | 6          | 93   | 1.25              | 4                 | 10.7     | 10.3     |
| 7705704   | <i>GSTK1</i>     | 28.76%   | 2                 | 5          | 17   | 1.247             | 4                 | 25.5     | 8.41     |
| 4507127   | <i>SNRPC</i>     | 13.21%   | 2                 | 2          | 12   | 1.236             | 4                 | 17.4     | 9.67     |
| 27597059  | <i>DNAJC9</i>    | 23.85%   | 3                 | 5          | 19   | 1.221             | 4                 | 29.9     | 5.73     |
| 262231786 | <i>MSH5</i>      | 0.85%    | 1                 | 1          | 4    | 1.215             | 4                 | 91.8     | 6.2      |

n = 77
